# Supplementary material for: MC3R gene polymorphisms are associated with early childhood adiposity gain and infant appetite in an Asian population
Source: PubMed Central journal article supplement — Pediatr Obes. 2015 Dec 11;11(6):450–8. doi: 10.1111/ijpo.12086 (PMC5111755; doi:10.1111/ijpo.12086), 2015-12-11

Table S1: Inter-observer reliability of anthropometric measurements

|                                   | <b>TEM</b> | <b>CV (%)</b> |
|-----------------------------------|------------|---------------|
| <b>Weight (kg)</b>                | 0.09       | 0.19          |
| <b>Height (cm)</b>                | 0.26       | 0.16          |
| <b>Triceps skinfolds (mm)</b>     | 0.80       | 6.00          |
| <b>Subscapular skinfolds (mm)</b> | 0.83       | 4.18          |

TEM: Technical error of measurement; CV: coefficient of variation

Table S2: Allele frequency and Hardy-Weinberg test of the 9 SNPs genotyped at the *MC3R* locus in the GUSTO population

| SNP ID                     | SNP position | Observed Heterozygosity |         |       |        | Hardy-Weinberg p-value |         |       |        | Minor allele frequency |         |       |        | Alleles (major: minor) |
|----------------------------|--------------|-------------------------|---------|-------|--------|------------------------|---------|-------|--------|------------------------|---------|-------|--------|------------------------|
|                            |              | Overall                 | Chinese | Malay | Indian | Overall                | Chinese | Malay | Indian | Overall                | Chinese | Malay | Indian |                        |
| <b>MC3R</b>                |              |                         |         |       |        |                        |         |       |        |                        |         |       |        |                        |
| 1 rs3746619                | 54823805     | 0.355                   | 0.323   | 0.391 | 0.396  | 0.565                  | 0.323   | 0.963 | 1.000  | 0.238                  | 0.215   | 0.261 | 0.274  | C:A                    |
| 2 exm1969518 (rs184418987) | 54823993     | 0.001                   | 0.002   | 0.000 | 0.000  | 1.000                  | 1.000   | 1.000 | 1.000  | 0.000                  | 0.001   | 0.000 | 0.000  | A:T                    |
| 3 exm1551534 (rs3827103)   | 54824029     | 0.351                   | 0.323   | 0.391 | 0.371  | 0.451                  | 0.323   | 0.963 | 0.667  | 0.235                  | 0.215   | 0.261 | 0.261  | G:A                    |
| 4 rs3827103                | 54824029     | 0.351                   | 0.323   | 0.391 | 0.371  | 0.438                  | 0.323   | 0.963 | 0.667  | 0.235                  | 0.215   | 0.261 | 0.261  | G:A                    |
| 5 exm1551535 (rs143321797) | 54824033     | 0.000                   | 0.000   | 0.000 | 0.000  | 1.000                  | 1.000   | 1.000 | 1.000  | 0.000                  | 0.000   | 0.000 | 0.000  | A:A                    |
| 6 exm1969522 (rs61735256)  | 54824533     | 0.000                   | 0.000   | 0.000 | 0.000  | 1.000                  | 1.000   | 1.000 | 1.000  | 0.000                  | 0.000   | 0.000 | 0.000  | G:G                    |
| 7 exm1551559 (rs61735259)  | 54824557     | 0.000                   | 0.000   | 0.000 | 0.000  | 1.000                  | 1.000   | 1.000 | 1.000  | 0.000                  | 0.000   | 0.000 | 0.000  | C:C                    |
| 8 exm1551560 (rs144585517) | 54824612     | 0.000                   | 0.000   | 0.000 | 0.000  | 1.000                  | 1.000   | 1.000 | 1.000  | 0.000                  | 0.000   | 0.000 | 0.000  | A:A                    |
| 9 exm1551565 (rs146000025) | 54824677     | 0.000                   | 0.000   | 0.000 | 0.000  | 1.000                  | 1.000   | 1.000 | 1.000  | 0.000                  | 0.000   | 0.000 | 0.000  | G:G                    |

Table S3: Factor loadings for all items of the Children Eating Behaviour Questionnaire (CEBQ) and Cronbach-Alpha scores for each subscale

| Items <sup>a</sup>                                                          | Factors determined through factor analysis <sup>b</sup> |                               |                              |                           |                            |                        |                               |                                    | Original scale <sup>d</sup> | Cronbach alpha |       |
|-----------------------------------------------------------------------------|---------------------------------------------------------|-------------------------------|------------------------------|---------------------------|----------------------------|------------------------|-------------------------------|------------------------------------|-----------------------------|----------------|-------|
|                                                                             | 1<br>'Enjoyment of food/ Food fussiness                 | 2<br>'Emotional under eating' | 3<br>'Emotional over eating' | 4<br>'Slowness in eating' | 5<br>'Food responsiveness' | 6<br>'Desire to drink' | 7<br>'Satiety responsiveness' | 8<br>' Not applicable <sup>c</sup> |                             |                |       |
| My child loves food                                                         | 0.788                                                   |                               |                              |                           |                            |                        |                               |                                    | EF                          | 0.909          |       |
| My child is interested in food                                              | 0.826                                                   |                               |                              |                           |                            |                        |                               |                                    | EF                          |                |       |
| My child refuses new foods at first(R)                                      | 0.633                                                   |                               |                              |                           |                            |                        |                               |                                    | FF                          |                |       |
| My child enjoys tasting new foods                                           | 0.767                                                   |                               |                              |                           |                            |                        |                               |                                    | FF                          |                |       |
| My child enjoys a wide variety of foods                                     | 0.798                                                   |                               |                              |                           |                            |                        |                               |                                    | FF                          |                |       |
| My child looks forward to mealtimes                                         | 0.671                                                   |                               |                              |                           |                            |                        |                               |                                    | EF                          |                |       |
| My child enjoys eating                                                      | 0.751                                                   |                               |                              |                           |                            |                        |                               |                                    | EF                          |                |       |
| My child is difficult to please with meals (R)                              | 0.602                                                   |                               |                              |                           |                            |                        |                               |                                    | FF                          |                |       |
| My child is interested in tasting food s/he hasn't tasted before            | 0.688                                                   |                               |                              |                           |                            |                        |                               |                                    | FF                          |                |       |
| My child decides that s/he doesn't like a food, even without tasting it (R) | 0.592                                                   |                               |                              |                           |                            |                        |                               |                                    | FF                          |                |       |
| My child eats less when angry                                               |                                                         | 0.729                         |                              |                           |                            |                        |                               |                                    | EUE                         |                | 0.785 |
| My child eats less when s/he is tired                                       |                                                         | 0.784                         |                              |                           |                            |                        |                               |                                    | EUE                         |                |       |
| My child eats more when she is happy                                        |                                                         | 0.577                         |                              |                           |                            |                        |                               |                                    | EUE                         |                |       |
| My child eats less when upset                                               |                                                         | 0.867                         |                              |                           |                            |                        |                               |                                    | EUE                         |                |       |
| My child eats more when worried                                             |                                                         |                               | 0.762                        |                           |                            |                        |                               |                                    | EOE                         | 0.778          |       |
| My child eats more when annoyed                                             |                                                         |                               | 0.774                        |                           |                            |                        |                               |                                    | EOE                         |                |       |
| My child eats more when anxious                                             |                                                         |                               | 0.787                        |                           |                            |                        |                               |                                    | EOE                         |                |       |
| My child finishes his/her meal quickly                                      |                                                         |                               |                              | 0.743                     |                            |                        |                               |                                    | SE                          | 0.753          |       |
| My child eats slowly                                                        |                                                         |                               |                              | 0.768                     |                            |                        |                               |                                    | SE                          |                |       |
| My child takes more than 30 minutes to finish a meal                        |                                                         |                               |                              | 0.599                     |                            |                        |                               |                                    | SE                          |                |       |
| If allowed to, my child would eat too much                                  |                                                         |                               |                              | 0.583                     |                            |                        |                               |                                    | FR                          | 0.777          |       |
| Even if my child is full up s/he finds room to eat his/her favorite food    |                                                         |                               |                              | 0.712                     |                            |                        |                               |                                    | FR                          |                |       |
| If given the chance, my child would always have food in his/her mouth       |                                                         |                               |                              | 0.585                     |                            |                        |                               |                                    | FR                          |                |       |
| My child is always asking for a drink                                       |                                                         |                               |                              |                           | 0.746                      |                        |                               |                                    | DD                          | 0.739          |       |
| If given the chance, my child would drink continuously throughout the day   |                                                         |                               |                              |                           | 0.758                      |                        |                               |                                    | DD                          |                |       |
| If given the chance, my child would always be having a drink                |                                                         |                               |                              |                           | 0.829                      |                        |                               |                                    | DD                          |                |       |
| My child leaves food on his/her plate at the end of a meal                  |                                                         |                               |                              |                           |                            | 0.627                  |                               |                                    | SR                          | 0.683          |       |
| My child gets full before his/her meal is finished                          |                                                         |                               |                              |                           |                            | 0.807                  |                               |                                    | SR                          |                |       |
| My child gets full up easily                                                |                                                         |                               |                              |                           |                            | 0.527                  |                               |                                    | SR                          |                |       |
| My child is always asking for food                                          |                                                         |                               |                              |                           |                            |                        | 0.513                         |                                    | SR                          |                |       |

a Items marked with (R) have been reversed scored. There are only 30 items in the table as the item 'My child has a big appetite', Given the choice, my child would eat most of the time, 'My child eats more s/he has nothing else to do', 'My child cannot eat a meal if s/he has had a snack just before', 'My child eats more and more slowly during the course of a meal' had a factor loading score below 0.5 and was not included into the subscales.

b Only items with factor loading scores above 0.5 are presented

c The eighth subscale was labelled as ' non applicable' as only one item loaded in this subscale and it was not used for further analysis

d Appetite scale the item was originally intended to measure: EF, 'enjoyment of food' ; FR, ' food responsiveness', FF, ' food fussiness', SR ' satiety responsiveness'; SE 'slowness in eating' ; EUE, ' Emotional Under Eating' ; EOE, ' Emotional Over Eating' ; DD, 'desire to drink'

Table S4: Clinical characteristics of mothers by offspring *MC3R* genotype

|                                                                        | <i>MC3R</i> rs3746619 |               |              | P value <sup>#</sup> |
|------------------------------------------------------------------------|-----------------------|---------------|--------------|----------------------|
|                                                                        | CC<br>N = 639         | AC<br>N = 385 | AA<br>N = 66 |                      |
| <b>Age (years)</b>                                                     | 30.6 ± 5.0            | 30.8 ± 5.3    | 31.2 ± 5.2   | 0.680                |
| <b>Education level</b>                                                 |                       |               |              | 0.111                |
| < 12 years                                                             | 242 (55.4)            | 162 (37.1)    | 33 (7.6)     |                      |
| ≥ 12 years                                                             | 389 (60.8)            | 218 (34.1)    | 33 (5.2)     |                      |
| <b>Type of housing</b>                                                 |                       |               |              | 0.103                |
| Government                                                             | 573 (58.1)            | 348 (35.3)    | 65 (6.6)     |                      |
| Private                                                                | 58 (63.7)             | 32 (35.2)     | 1 (1.1)      |                      |
| <b>Marital status</b>                                                  |                       |               |              | 0.803                |
| Married                                                                | 607 (58.8)            | 361 (35.0)    | 64 (6.2)     |                      |
| Single/Divorced                                                        | 19 (51.4)             | 15 (42.9)     | 2 (5.7)      |                      |
| <b>Parity</b>                                                          |                       |               |              | 0.755                |
| Primiparous                                                            | 286 (57.7)            | 181 (36.5)    | 29 (5.8)     |                      |
| Multiparous                                                            | 353 (59.4)            | 204 (34.3)    | 37 (6.2)     |                      |
| <b>Body Mass Index (kg/m<sup>2</sup>)<br/>at 26-28 weeks pregnancy</b> | 26.1 ± 4.3            | 26.5 ± 4.6    | 25.7 ± 4.7   | 0.305                |
| <b>Gestational diabetes</b>                                            |                       |               |              | 0.854                |
| No                                                                     | 480 (58.0)            | 294 (35.6)    | 53 (6.4)     |                      |
| Yes                                                                    | 110 (58.5)            | 68 (36.2)     | 10 (5.3)     |                      |

Numbers represent mean ± SD or n(%)

<sup>#</sup> P value for continuous variables by One-Way ANOVA; for categorical variables by chi-square analysis

Table S5: Characteristics of participants who completed the CEBQ questionnaire, compared to those who did not complete the CEBQ questionnaire

|                                     | <b>Completed<br/>CEBQ (n = 422)</b> | <b>Did not complete<br/>CEBQ (n = 668)</b> | <b>P value</b>   |
|-------------------------------------|-------------------------------------|--------------------------------------------|------------------|
| <b>Maternal education</b>           |                                     |                                            | <b>0.022</b>     |
| < 12 years                          | 152 (36.3)                          | 285 (43.3)                                 |                  |
| ≥ 12 years                          | 267 (63.7)                          | 373 (56.7)                                 |                  |
| <b>Ethnicity</b>                    |                                     |                                            | <b>&lt;0.001</b> |
| Chinese                             | 268 (63.5)                          | 349 (52.2)                                 |                  |
| Malay                               | 101 (23.9)                          | 175 (26.2)                                 |                  |
| Indian                              | 53 (12.6)                           | 144 (21.6)                                 |                  |
| <b>Parity</b>                       |                                     |                                            | 0.452            |
| Primiparous                         | 186 (44.1)                          | 310 (36.4)                                 |                  |
| Multiparous                         | 236 (55.9)                          | 358 (53.6)                                 |                  |
| <b>BMI at 26-28 weeks pregnancy</b> | 25.8 ± 4.1                          | 26.5 ± 4.6                                 | <b>0.011</b>     |
| <b>Gestational age at delivery</b>  | 38.6 ± 1.0                          | 38.1 ± 1.6                                 | <b>&lt;0.001</b> |
| <b>Gender</b>                       |                                     |                                            | 0.879            |
| Male                                | 197 (46.7)                          | 315 (47.2)                                 |                  |
| Female                              | 225 (53.3)                          | 353 (52.8)                                 |                  |
| <b>Breastfeeding duration</b>       |                                     |                                            | <b>0.015</b>     |
| < 6 months                          | 206 (56.9)                          | 287 (64.5)                                 |                  |
| ≥ 6 months                          | 161 (43.1)                          | 158 (35.5)                                 |                  |
| <b>Birth weight (kg)</b>            | 3.2 ± 0.4                           | 3.0 ± 0.5                                  | <b>&lt;0.001</b> |

Table S6: Association between *MC3R* with childhood appetitive traits at 12-months of age

|                        | <b>B</b> | <b>95% Confidence Intervals</b> |                    | <b>P value</b> |
|------------------------|----------|---------------------------------|--------------------|----------------|
|                        |          | <b>Lower bound</b>              | <b>Upper bound</b> |                |
| <b>CEBQ</b>            |          |                                 |                    |                |
| Enjoyment of food      | -0.002   | -0.18                           | 0.17               | 0.982          |
| Food responsiveness    | 0.07     | -0.10                           | 0.24               | 0.522          |
| Emotional under eating | 0.05     | -0.11                           | 0.21               | 0.405          |
| Slowness in eating     | 0.24     | 0.06                            | 0.39               | <b>0.006</b>   |
| Emotional over eating  | 0.14     | -0.04                           | 0.31               | 0.132          |
| Desire to drink        | 0.08     | -0.10                           | 0.25               | 0.374          |
| Satiety responsiveness | -0.13    | -0.30                           | 0.03               | 0.119          |

Adjusted for maternal education, BMI at 26-28 week gestation, gender, ethnicity, birthweight-for-gestational age and breastfeeding duration

Figure S1: Flowchart for GUSTO Study recruitment and eventual study sample

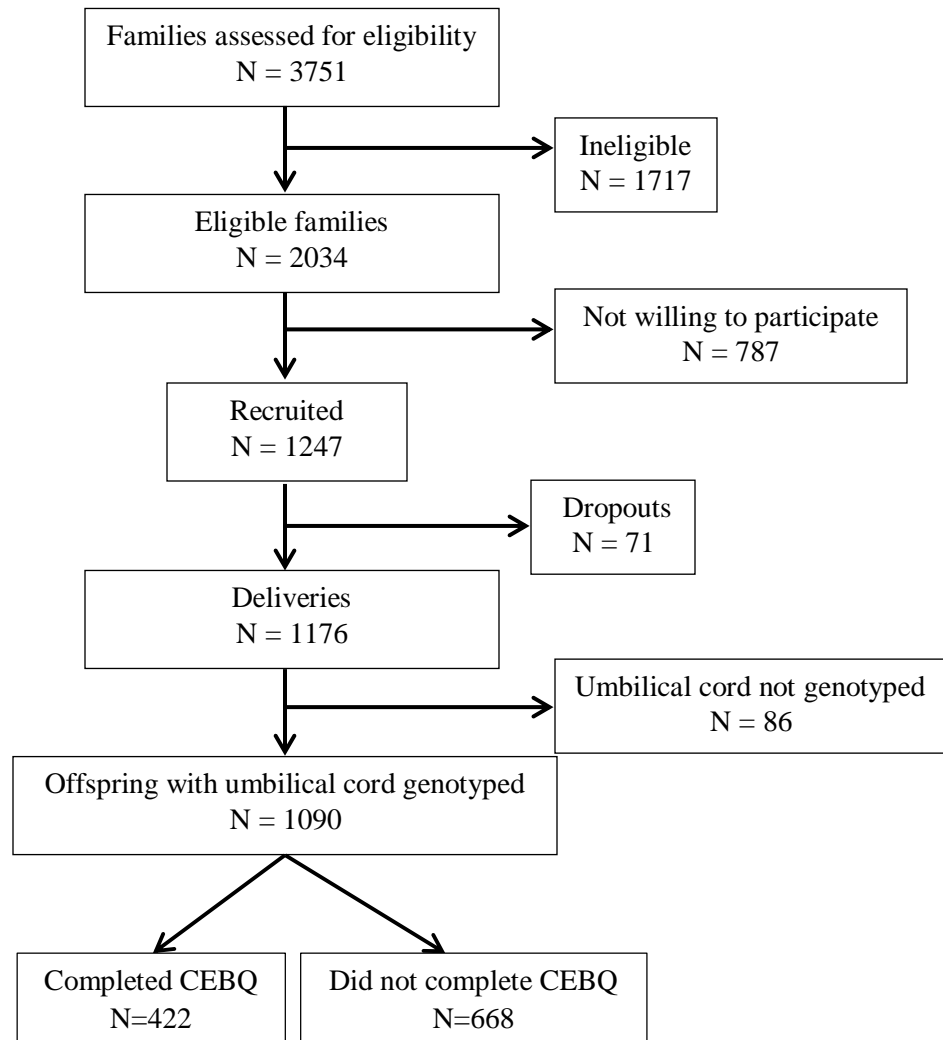

Figure S2: Linkage disequilibrium ( $r^2$ ) between the two MC3R variants

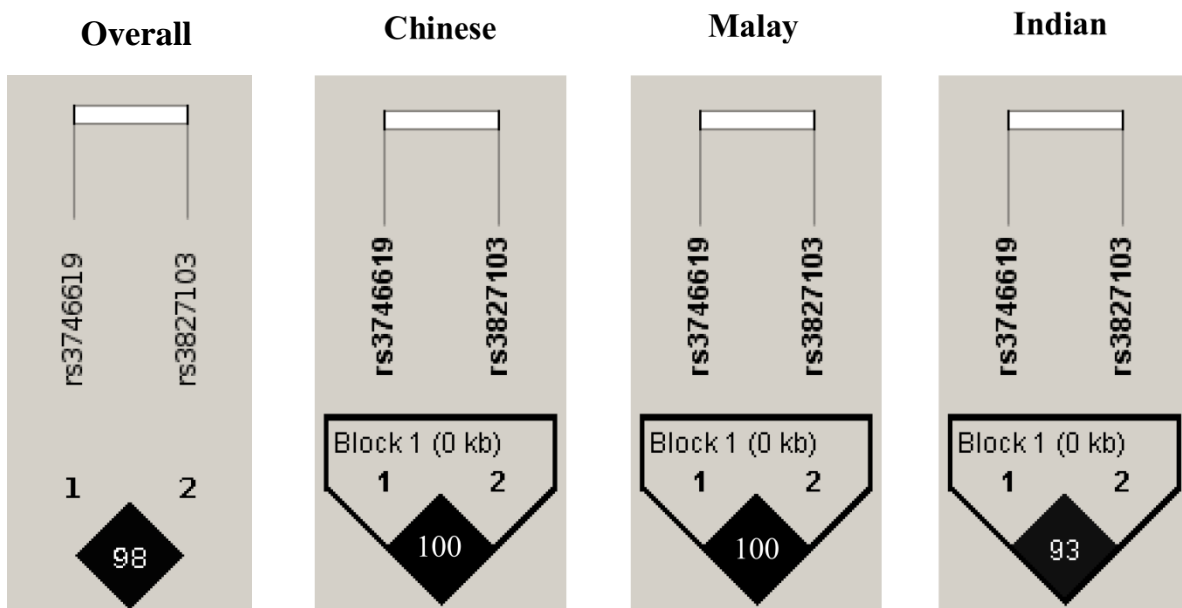



Figure S3: Percentage of offspring who are overweight in the first 48-months by offspring *MC3R* rs3746619 genotype

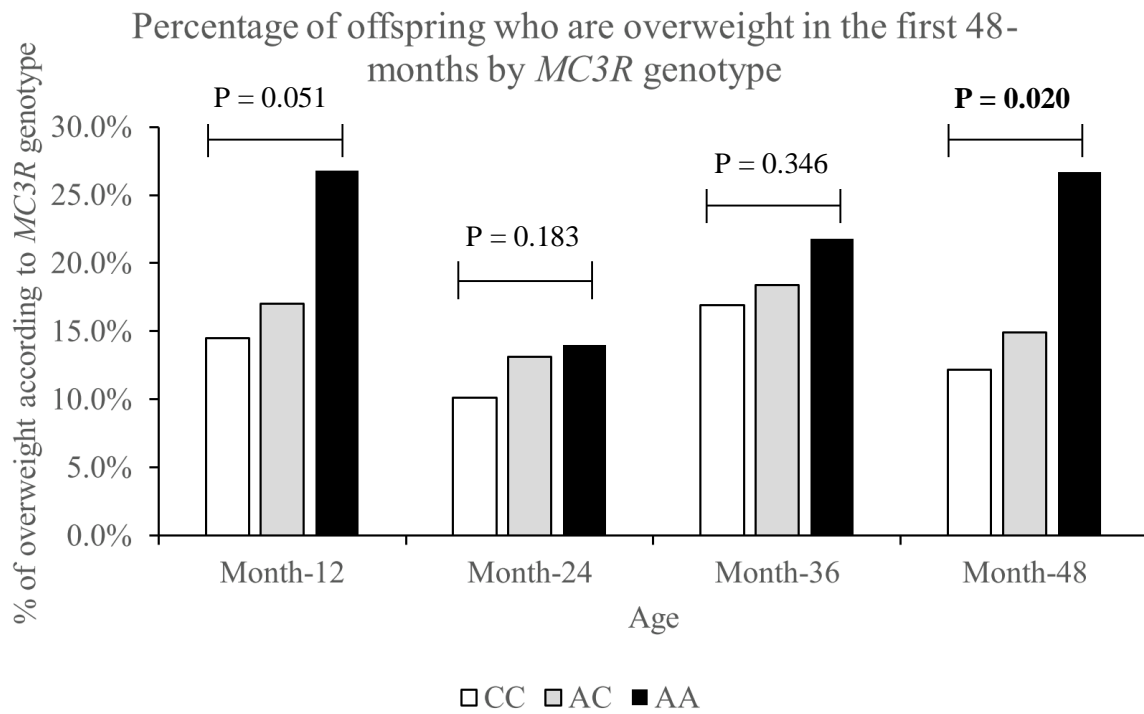

Figure S4: Percentage of offspring who are obese in the first 48-months by offspring *MC3R* rs3746619 genotype

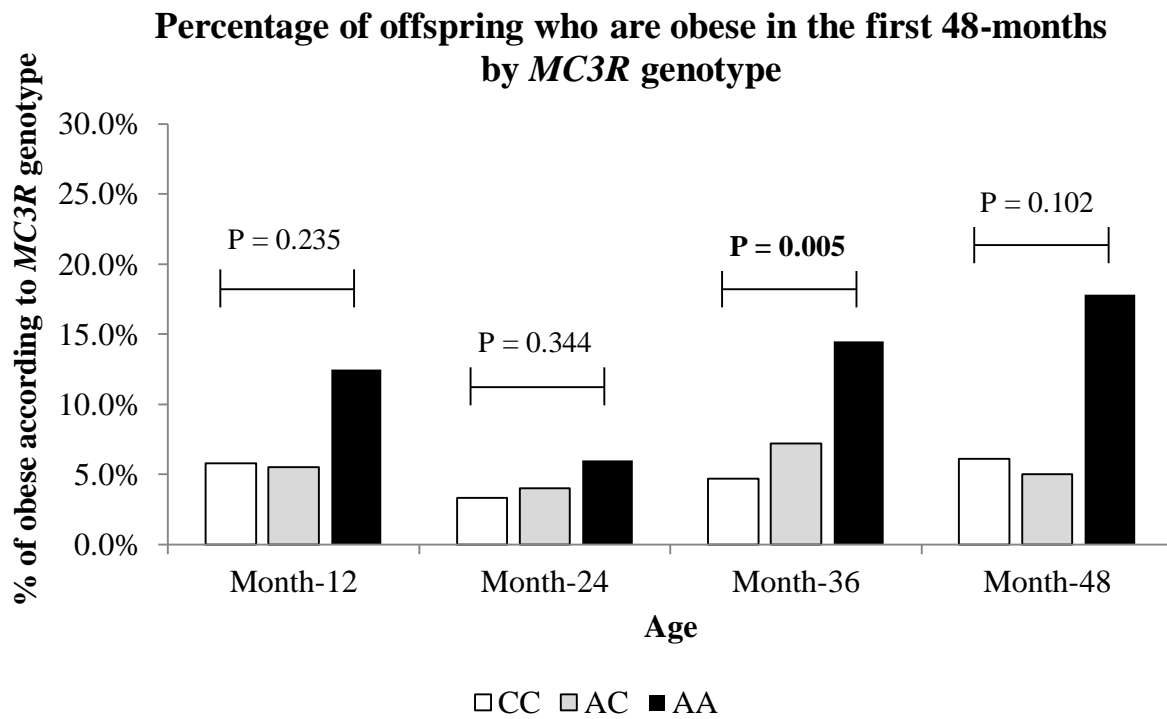

Supplement: IJPO-11-450-s001.pdf [file IJPO-11-450-s001.pdf]
